# Supplementary material for: Population size and structure of Grant’s gazelle and lesser kudu in Geralle National Park, Southeastern Ethiopia
Source: PeerJ. 2024 Nov 15;12:e18340. doi: 10.7717/peerj.18340 (PMC11572394; doi:10.7717/peerj.18340)
Supplement: Supplemental Information 1 [file peerj-12-18340-s001.xlsx]

## Sheet: GA
Habitat	Area	T.N	TRL	S.D	Species	Total	AM	AM	SAM	SAF	JUV	CAL	UNK	Sesson	Season
SL	692	12	3.4	100	Ga	9	2	4		1	2		1	DS1	DS
SL	692	12	3.4	30	Ga	7	2	3		1	1			DS2	DS
SL	692	12	3.4	60	Ga	3		2			1			WS2	WS
SL	692	15	2.8	130	Ga	5	1	2	1	1				WS1	WS
SL	692	15	2.8	130	Ga	3		2					1	DS2	DS
SL	692	15	2.8	80	Ga	5	1	2	1	1				WS2	WS
SL	692	5	6.2	70	Ga	4	1	3					1	DS1	DS
SL	692	5	6.2	70	Ga	2	1	1						DS1	DS
SL	692	6	5.4	80	Ga	7	1	2	1	1			2	WS1	WS
SL	692	6	5.4	120	Ga	5	1	3					1	DS1	DS
SL	692	6	5.4	80	Ga	5	1	2	1	1				WS2	WS
BL	692	7	4.5	80	Ga	3	1	2						WS1	WS
GL	692	1	3.8	100	Ga	11	2	4		2	2		1	DS1	DS
GL	692	1	3.8	70	Ga	10	3	4		1	2			WS1	WS
GL	692	1	3.8	80	Ga	5	2	3						DS1	DS
GL	692	1	3.8	100	Ga	4	1	2			1			WS1	WS
GL	692	1	3.8	100	Ga	5	2	3					4	DS1	DS
GL	692	1	3.8	80	Ga	11	2	4	1	2	1		1	DS2	DS
GL	692	10	2.8	60	Ga	9	2	4			1		2	DS1	DS
GL	692	10	2.8	40	Ga	8	2	3	1	1			1	WS1	WS
GL	692	10	2.8	80	Ga	3	1	2						DS1	DS
GL	692	10	2.8	80	Ga	5	1	2		1	1			DS2	DS
GL	692	10	2.8	80	Ga	3	1	2						DS2	DS
GL	692	10	2.8	60	Ga	8	1	2	1	2	1		1	WS2	WS
GL	692	11	3.3	80	Ga	5	2	3						DS1	DS
GL	692	11	3.3	50	Ga	5	1	2		1	1			WS1	WS
GL	692	11	3.3	70	Ga	3		2					1	DS1	DS
GL	692	11	3.3	100	Ga	7	2	3		2				WS1	WS
GL	692	11	3.3	30	Ga	5	2	3						DS2	DS
GL	692	11	3.3	80	Ga	10	3	4		1	1		1	WS2	WS
GL	692	11	3.3	20	Ga	7	2	3		2				WS2	WS
GL	692	11	3.3	60	Ga	5	1	2		1	1			WS2	WS
GL	692	13	3	40	Ga	6	1	2	1	1	1			WS1	WS
GL	692	13	3	80	Ga	2	1	1						DS1	DS
GL	692	13	3	100	Ga	4	1	2		1				DS1	DS
GL	692	13	3	40	Ga	2	1	1						DS2	DS
GL	692	13	3	50	Ga	4	1	2		1				DS2	DS
GL	692	13	3	30	Ga	6	1	2	1	1	1			WS2	WS
GL	692	14	3.2	80	Ga	14	4	5	1	2			2	WS1	WS
GL	692	14	3.2	60	Ga	5	1	2	1	1				DS1	DS
GL	692	14	3.2	90	Ga	3		2		1				DS1	DS
GL	692	14	3.2	100	Ga	5	1	2	1	1				DS2	DS
GL	692	14	3.2	50	Ga	3		2		1				DS2	DS
GL	692	14	3.2	80	Ga	4	1	2			1			WS2	WS
GL	692	14	3.2	60	Ga	12	3	5	1	2			1	WS2	WS
SL	692	16	5	120	Ga	2		2						DS2	DS
BL	692	22	5	70	GR	5	1	2		1	1			WS1	WS
BL	692	22	5	80	GR	2	1	1						WS1	WS
BL	692	22	5	40	GR	3	1	2						DS1	DS
BL	692	22	5	120	GR	3	1	2						WS2	WS
BL	692	22	5	100	GR	2	1	1						WS2	WS
BL	692	22	5	80	GR	4	2	2						DS2	DS
BL	692	23	5.3	100	GR	4	1	2			1			WS1	WS
BL	692	23	5.3	50	GR	2	1	1						WS1	WS
BL	692	23	5.3	80	GR	2	1	1						DS1	DS
BL	692	23	5.3	30	GR	5	2	2		1				DS1	DS
BL	692	23	5.3	100	GR	2	1	1						WS2	WS
BL	692	23	5.3	50	GR	4	1	2			1			WS2	WS
BL	692	33	4.4	40	GR	3	1	1		1				WS1	WS
BL	692	33	4.4	80	GR	3	1	2						DS1	DS
BL	692	33	4.4	100	GR	2	1	1						WS1	WS
BL	692	33	4.4	100	GR	5	1	2		1	1			DS1	DS
BL	692	33	4.4	120	GR	2	1	1						WS2	WS
BL	692	33	4.4	100	GR	3	1	1		1				WS2	WS
BL	692	33	4.4	100	GR	3	1	2						DS2	DS
BL	692	33	4.4	120	GR	5	1	2		1	1			DS2	DS
BL	692	35	5.4	130	GR	3	1	2						WS1	WS
BL	692	35	5.4	100	GR	2	1	1						WS1	WS
BL	692	35	5.4	70	GR	2	1	1						DS1	DS
BL	692	35	5.4	120	GR	2	1	1						DS2	DS
BL	692	35	5.4	80	GR	3	1	1		1				DS2	DS
BL	692	35	5.4	100	GR	2	1	1						WS2	WS
BL	692	35	5.4	80	GR	3	1	2						WS2	WS
BL	692	36	5.2	80	GR	3	1	2						WS1	WS
BL	692	36	5.2	70	GR	3	1	2						DS1	DS
BL	692	36	5.2	90	GR	2	1	1						WS2	WS
BL	692	36	5.2	60	GR	5	1	1	1	1	1			WS2	WS
BL	692	36	5.2	120	GR	3	1	2						DS2	DS
BL	692	4	4.2	70	GR	5	2	3						DS1	DS
BL	692	4	4.2	80	GR	4	1	2			1			WS1	WS
BL	692	4	4.2	90	GR	4	1	2		1				DS1	DS
BL	692	4	4.2	70	GR	3	1	2	1					DS1	DS
BL	692	4	4.2	50	GR	3	1	2						WS2	WS
BL	692	4	4.2	30	GR	4	1	2		1				DS2	DS
BL	692	4	4.2	70	GR	3	1	1	1					DS2	DS
BL	692	7	4.5	20	GR	4	1	2		1				WS1	WS
BL	692	7	4.5	60	GR	4	1	2		1				DS1	DS
BL	692	7	4.5	40	Gr	4	1	2			1			WS1	WS
BL	692	7	4.5	30	Gr	1	1							DS1	DS
BL	692	7	4.5	120	Gr	4	1	2		1				WS2	WS
BL	692	7	4.5	90	Gr	4	1	2			1			WS2	WS
BL	692	7	4.5	100	Gr	2	1	1						DS2	DS
BL	692	7	4.5	140	Gr	1	1							DS2	DS
BL	692	4		120	Gr	3	1	2						WS1	WS
GL	692	1	3.8	80	Gr	4	1	1	1	1				WS1	WS
GL	692	1	3.8	60	Gr	2	1	1						DS1	DS
GL	692	1	3.8	50	Gr	5	1	2	1	1				WS1	WS
GL	692	1	3.8	30	Gr	4	1	2		1				DS1	DS
GL	692	1	3.8	80	Gr	2	1	1						WS1	WS
GL	692	1	3.8	70	Gr	3	1	1		1				WS1	WS
GL	692	1	3.8	70	Gr	5	1	2	1	1				WS2	WS
GL	692	1	3.8	120	Gr	2		1			1			WS2	WS
GL	692	1	3.8	80	Gr	3	1	1		1				WS2	WS
GL	692	1	3.8	100	Gr	2	1	1						DS2	DS
GL	692	10	2.8	90	Gr	2	1	1						WS1	WS
GL	692	10	2.8	110	Gr	4	1	2		1				DS1	DS
GL	692	10	2.8	60	Gr	3	1	1	1					WS1	WS
GL	692	10	2.8	70	Gr	2		2						DS1	DS
GL	692	10	2.8	50	Gr	4	1	2		1	1			WS2	WS
GL	692	10	2.8	80	Gr	4	1	2		1				DS2	DS
GL	692	11	3.3	100	Gr	4	1	1	1	1				WS1	WS
GL	692	11	3.3	90	Gr	5	1	2	1	1				WS1	WS
GL	692	11	3.3	30	Gr	3	1	2						DS1	DS
GL	692	11	3.3	100	Gr	4	1	1	1	1				WS2	WS
GL	692	11	3.3	100	Gr	3	1	1		1				WS2	WS
GL	692	11	3.3	110	Gr	2	1	1						DS2	DS
GL	692	13	3	100	Gr	3	1	2						WS1	WS
GL	692	13	3	40	Gr	4	1	2		1				DS1	DS
GL	692	13	3	60	Gr	4	1	2		1				WS1	WS
GL	692	13	3	70	Gr	5	1	2		1	1			DS1	DS
GL	692	13	3	80	Gr	2	1	1						WS2	WS
GL	692	13	3	60	Gr	3	1	2						WS2	WS
GL	692	13	3	80	Gr	2		1		1				DS2	DS
GL	692	13	3	60	Gr	5	1	2		1	1			DS2	DS
GL	692	14	3.2	100	Gr	3	1	1		1				WS1	WS
GL	692	14	3.2	50	Gr	1	1							DS1	DS
GL	692	14	3.2	70	Gr	3	1	1	1					DS1	DS
GL	692	14	3.2	30	Gr	4	2	2						DS1	DS
GL	692	14	3.2	40	Gr	2		2						WS2	WS
GL	692	14	3.2	90	Gr	3	1	1	1					DS2	DS
GL	692	14	3.2	110	Gr	3	1	2						DS2	DS
GL	692	14		90	Gr	3	1	1		1				WS2	WS
SL	692	16	5	70	Gr	3	1	2						DS1	DS
SL	692	16	5	100	Gr	2		1		1				DS1	DS
SL	692	16	5	80	Gr	2		2						WS1	WS
SL	692	16	5	50	Gr	4		2	1	1				WS1	WS
SL	692	16	5	70	Gr	2	1	1						WS1	WS
SL	692	16	5	80	Gr	2	1	1						DS2	DS
SL	692	16	5	60	Gr	1		1						DS2	DS
SL	692	16	5	100	Gr	2	1	1						WS2	WS
SL	692	16	5	60	Gr	2		2						WS2	WS
SL	692	28	5.6	100	Gr	3	1	1		1				DS1	DS
SL	692	28	5.6	50	Gr	2	1	1						DS1	DS
SL	692	28	5.6	100	Gr	5	1	2		1	1			WS1	WS
SL	692	28	5.6	130	Gr	3	1	1		1				DS2	DS
SL	692	28	5.6	70	Gr	2	1	1						DS2	DS
SL	692	28	5.6	120	Gr	2	1	1						WS2	WS
SL	692	28	5.6	100	Gr	3	1	1			1			WS2	WS
SL	692	29	5.9	120	Gr	5	1	2	1	1				DS1	DS
SL	692	29	5.9	130	Gr	2	1	1						DS1	DS
SL	692	29	5.9	80	Gr	2	1	1						WS1	WS
SL	692	29	5.9	130	Gr	3	1	1	1					WS1	WS
SL	692	29	5.9	100	Gr	1		1						DS2	DS
SL	692	29	5.9	120	Gr	2	1	1						WS2	WS
SL	692	32	5.7	130	Gr	3	1	2						DS1	DS
SL	692	32	5.7	120	Gr	2		2						WS1	WS
SL	692	32	5.7	100	Gr	2	1	1						DS1	DS
SL	692	32	5.7	130	Gr	3	1	1		1				WS1	WS
SL	692	32	5.7	100	Gr	2		2						DS2	DS
SL	692	32	5.7	120	Gr	2	1	1						DS2	DS
SL	692	32	5.7	110	Gr	4	2	2						DS2	DS
SL	692	32	5.7	100	Gr	3	1	1		1				WS2	WS
SL	692	32	5.7	90	Gr	1		1						WS2	WS
WL	692	17	3.5	80	Gr	3	1	1		1				WS1	WS
WL	692	17	3.5	130	Gr	3	1	1		1				WS2	WS
WL	692	18	5	130	Gr	3	1	2						DS1	DS
WL	692	18	5	130	Gr	2	1	1						WS1	WS
WL	692	18	5	100	Gr	4	1	2		1				WS1	WS
WL	692	18	5	140	Gr	3	1	2						DS2	DS
WL	692	18	5	150	Gr	4	1	2		1				WS2	WS
WL	692	18	5	100	Gr	2		1		1				WS2	WS
WL	692	19	5.5	40	Gr	3	1	1		1				DS1	DS
WL	692	19	5.5	100	Gr	3	1	1		1				WS1	WS
WL	692	19	5.5	120	Gr	2	1	1						WS1	WS
WL	692	19	5.5	70	Gr	2	1	1						WS2	WS
WL	692	19	5.5	50	Gr	3	1	2						WS2	WS
WL	692	2	3.8	50	Gr	2	1	1						WS1	WS
WL	692	2	3.8	80	Gr	2	1	1						DS2	DS
WL	692	20	4.3	70	Gr	3	1	1		1				DS1	DS
WL	692	20	4.3	60	Gr	2	1	1						DS1	DS
WL	692	20	4.3	30	Gr	2	1	1						WS1	WS
WL	692	20	4.3	50	Gr	2		2						WS1	WS
WL	692	20	4.3	70	Gr	3	1	1		1				DS2	DS
WL	692	21	4.5	60	Gr	2	1	1						DS1	DS
WL	692	21	4.5	80	Gr	1	1							WS1	WS
WL	692	21	4.5	60	Gr	2	1	1						WS1	WS
WL	692	21	4.5	40	Gr	2	1	1						DS2	DS
WL	692	21	4.5	30	Gr	2	1	1						WS2	WS
WL	692	25	5.6	60	Gr	3	1	2						DS1	DS
WL	692	25	5.6	70	Gr	1		1						WS1	WS
WL	692	25	5.6	40	Gr	3	1	1			1			WS1	WS
WL	692	25	5.6	50	Gr	1		1						WS2	WS
WL	692	25	5.6	25	Gr	3	1	1			1			WS2	WS
WL	692	26	5.2	20	Gr	2	1	1						DS1	DS
WL	692	26	5.2	70	Gr	2	1	1						WS1	WS
WL	692	26	5.2	60	Gr	2	1	1						WS1	WS
WL	692	26	5.2	50	Gr	2	1	1						DS2	DS
WL	692	26	4.8	60	Gr	2	1	1						WS2	WS
WL	692	27	4.8	60	Gr	3	1	2						WS1	WS
WL	692	3	4.2	30	Gr	2	1	1						DS1	DS
WL	692	3	4.2	80	Gr	3	1	2						DS1	DS
WL	692	3	4.2	10	Gr	4	1	2		1				WS1	WS
WL	692	3	4.2	50	Gr	1		1						WS1	WS
WL	692	3	4.2	80	Gr	2	1	1						DS2	DS
WL	692	3	4.2	30	Gr	4	1	1		1	1			WS2	WS
WL	692	30	4	40	Gr	2	1	1						DS1	DS
WL	692	30	4	50	Gr	2		1		1				WS1	WS
WL	692	30	4	80	Gr	1		1						DS2	DS
WL	692	31	4	60	Gr	2		1		1				WS2	WS
WL	692	31	4.6	40	Gr	3	1	1		1				DS1	DS
WL	692	31	4.6	20	Gr	2	1	1						WS1	WS
WL	692	31	4.6	70	Gr	3	1	1			1			WS1	WS
WL	692	31	4.6	90	Gr	3	1	1		1				DS2	DS
WL	692	31	4.6	60	Gr	3	1	1			1			WS2	WS
WL	692	8	3.8	80	Gr	2	1	1						DS1	DS
WL	692	8	3.8	70	Gr	2		2						DS1	DS
WL	692	8	3.8	60	Gr	2		1		1				WS1	WS
WL	692	8	3.8	80	Gr	2	1	1						WS1	WS
WL	692	8	3.8	40	Gr	3	1	2						WS1	WS
WL	692	8	3.8	70	Gr	2		2						DS2	DS
WL	692	8	3.8	80	Gr	2	1	1						WS2	WS
WL	692	8	3.8	70	Gr	3	1	2						WS2	WS
WL	692	9	5.2	60	Gr	3	1	2						DS1	DS
WL	692	9	5.2	70	Gr	2		2						DS1	DS
WL	692	9	5.2	80	Gr	4	1	1	1		1			WS1	WS
WL	692	9	5.2	40	Gr	2	1	1						WS1	WS
WL	692	9	5.2	80	Gr	3	1	2						DS2	DS
WL	692	9	5.2	70	Gr	2		2						DS2	DS
WL	692	9	5.2	80	Gr	2	1	1						WS2	WS
WL	692	9	5.2	90	Gr	4	1	2	1					WS2	WS

## Sheet: KU
Habitat	Area	T.N	TRL	S.D	Species	Total	AM	AM	SAM	SAF	JUV	CAL	UNK	Sesson	Season
SL	692	12	3.4	80	Ku	3	1	1		1				DS1	DS
SL	692	12	3.4	100	Ku	2	1	1						WS1	WS
SL	692	12	3.4	100	Ku	2	1	1						WS2	WS
SL	692	24	6.4	80	Ku	3	1	1		1				WS1	WS
SL	692	24	6.4	120	Ku	2	1	1						DS2	DS
SL	692	24	6.4	100	Ku	1		1						DS2	DS
SL	692	24	6.4	100	Ku	3	1	1			1			WS2	WS
SL	692	34	4.9	35	Ku	1	1							DS1	DS
SL	692	34	4.9	80	Ku	2		1		1				WS1	WS
SL	692	34	4.9	80	Ku	1		1						DS2	DS
SL	692	34	4.9	80	Ku	2		1		1				WS2	WS
SL	692	5	6.2	50	Ku	3	1	2						DS1	DS
SL	692	5	6.2	60	Ku	3	1	1					1	WS1	WS
SL	692	5	6.2	50	Ku	2	1	1						DS2	DS
SL	692	5	6.2	70	Ku	3	1	1		1				WS2	WS
SL	692	5	6.2	80	Ku	1	1							WS2	WS
SL	692	6	5.4	60	Ku	2	1	1						WS1	WS
SL	692	6	5.4	80	Ku	1	1	2						DS1	DS
SL	692	6	5.4	60	Ku	2		1		1				DS2	DS
BL	692	22	5	60	Ku	2		2						DS1	DS
BL	692	22	5	20	Ku	2		2						DS2	DS
BL	692	23	5.3	80	Ku	2		2						WS1	WS
BL	692	23	5.3	100	Ku	3	1	1	1					DS1	DS
BL	692	23	5.3	100	Ku	4	1	2		1				DS2	DS
BL	692	23	5.3	80	Ku	3	1	1	1					WS2	WS
BL	692	33	4.4	100	Ku	2	1	1						WS1	WS
BL	692	33	4.4	40	Ku	2	1	1						WS1	WS
BL	692	33	4.4	60	Ku	3	1	2						DS1	DS
BL	692	33	4.4	80	Ku	2	1	1						DS2	DS
BL	692	33	4.4	100	Ku	2	1	1						WS2	WS
BL	692	35	5.4	80	Ku	1		1						DS1	DS
BL	692	35	5.4	110	Ku	2	1	1						WS1	WS
BL	692	35	5.4	130	Ku	2	1	1						DS1	DS
BL	692	35	5.4	120	Ku	3	1	1	1					DS2	DS
BL	692	35	5.4	110	Ku	3	1	2						WS2	WS
BL	692	36	5.2	80	Ku	4	1	2		1				WS1	WS
BL	692	36	5.2	80	Ku	4	1	1		1			1	WS2	WS
BL	692	4	4.2	30	Ku	4	2	2						WS1	WS
BL	692	4	4.2	50	Ku	2	1	1						WS1	WS
BL	692	4	4.2	60	Ku	3	1	2						DS1	DS
BL	692	4	4.2	60	Ku	3	1	1		1				WS1	WS
BL	692	4	4.2	40	Ku	3	1	2						DS2	DS
BL	692	4	4.2	80	Ku	4	1	2		1				WS2	WS
BL	692	4	4.2	60	Ku	2		2						WS2	WS
BL	692	4	4.2	80	Ku	3	1	1	1					WS2	WS
BL	692	4	4.2	40	Ku	4	1	2		1				WS2	WS
BL	692	7	4.5	50	Ku	4	1	2		1				DS1	DS
BL	692	7	4.5	60	Ku	3	1	2						WS1	WS
BL	692	7	4.5	50	Ku	2	1	1						DS1	DS
BL	692	7	4.5	40	Ku	4	1	2		1				DS2	DS
BL	692	7	4.5	80	Ku	2	1	1						DS2	DS
BL	692	7	2.8	80	Ku	3	1	2						WS2	WS
BL	692	22	5	90	Ku	3	1	2						WS1	WS
SL	692	32		100	Ku	1	1							DS1	DS
SL	692	16	5	100	Ku	2	1	1						DS1	DS
SL	692	16	5	80	Ku	2		2						DS1	DS
SL	692	16	5	60	Ku	3	2	1						WS1	WS
SL	692	16	5	80	Ku	3	1	2						WS2	WS
SL	692	32	5.7	140	Ku	2		1		1				DS1	DS
SL	692	32	5.7	160	Ku	2	1	1						WS1	WS
WL	692	17	3.5	70	Ku	3	1	2						DS1	DS
WL	692	17	3.5	100	Ku	2	1	1						WS1	WS
WL	692	17	3.5	140	Ku	3	1	2						WS2	WS
WL	692	17	3.5	100	Ku	1	1							DS2	DS
WL	692	18	5	120	Ku	2		1					1	DS1	DS
WL	692	18	5	120	Ku	1	1							WS1	WS
WL	692	18	5	50	Ku	1		1						DS2	DS
WL	692	19	5.5	130	Ku	3	1	2						DS1	DS
WL	692	19	5.5	120	Ku	2		2						WS1	WS
WL	692	19	5.5	80	Ku	2	1	1						WS1	WS
WL	692	19	5.5	60	Ku	2		2						DS2	DS
WL	692	2	3.8	70	Ku	2	1	1						DS1	DS
WL	692	2	3.8	40	Ku	4	1	2		1				WS1	WS
WL	692	2	3.8	60	Ku	2	1	1						WS1	WS
WL	692	2	3.8	30	Ku	2	1	1						DS1	DS
WL	692	2	3.8	100	Ku	2	1	1		1				WS2	WS
WL	692	2	3.8	40	Ku	3	1	1			1			WS2	WS
WL	692	20	4.3	80	Ku	3	1	1					1	WS1	WS
WL	692	21	4.5	80	Ku	2	1	1						DS1	DS
WL	692	21	4.5	30	Ku	3	1	1		1				WS1	WS
WL	692	21	4.5	70	Ku	3	1	1		1				WS2	WS
WL	692	21	4.5	20	Ku	2	1	1						DS2	DS
WL	692	26	5.2	30	Ku	2	1	1						DS1	DS
WL	692	26	5.2	50	Ku	2		2						WS1	WS
WL	692	26	5.2	40	Ku	2	1	1						DS2	DS
WL	692	27	4.8	70	Ku	3	1	1	1					DS1	DS
WL	692	27	4.8	50	Ku	4	1	1		1			1	DS1	DS
WL	692	27	4.8	30	Ku	3	1	2						WS1	WS
WL	692	27	4.8	25	Ku	2		1		1				DS2	DS
WL	692	27	4.8	40	Ku	3	1	1	1					DS2	DS
WL	692	27	4.8	70	Ku	2		1	1					WS2	WS
WL	692	3	4.2	20	Ku	1	1							WS1	WS
WL	692	3	4.2	45	Ku	4	1	2		1				WS2	WS
WL	692	30	4	80	Ku	1		1						DS1	DS
WL	692	30	4	90	Ku	3	1			1			1	WS1	WS
WL	692	8	3.8	40	Ku	2	1	1						WS1	WS
WL	692	8	3.8	50	Ku	2	1	1						WS2	WS
WL	692	9	5.2	20	Ku	1	1							WS1	WS
